# Supplementary material
Source: PubMed Central journal article supplement (PMC5647490)
Supplement: Supp_Data.pdf [file Supp_Data.pdf]

## Supplementary Data

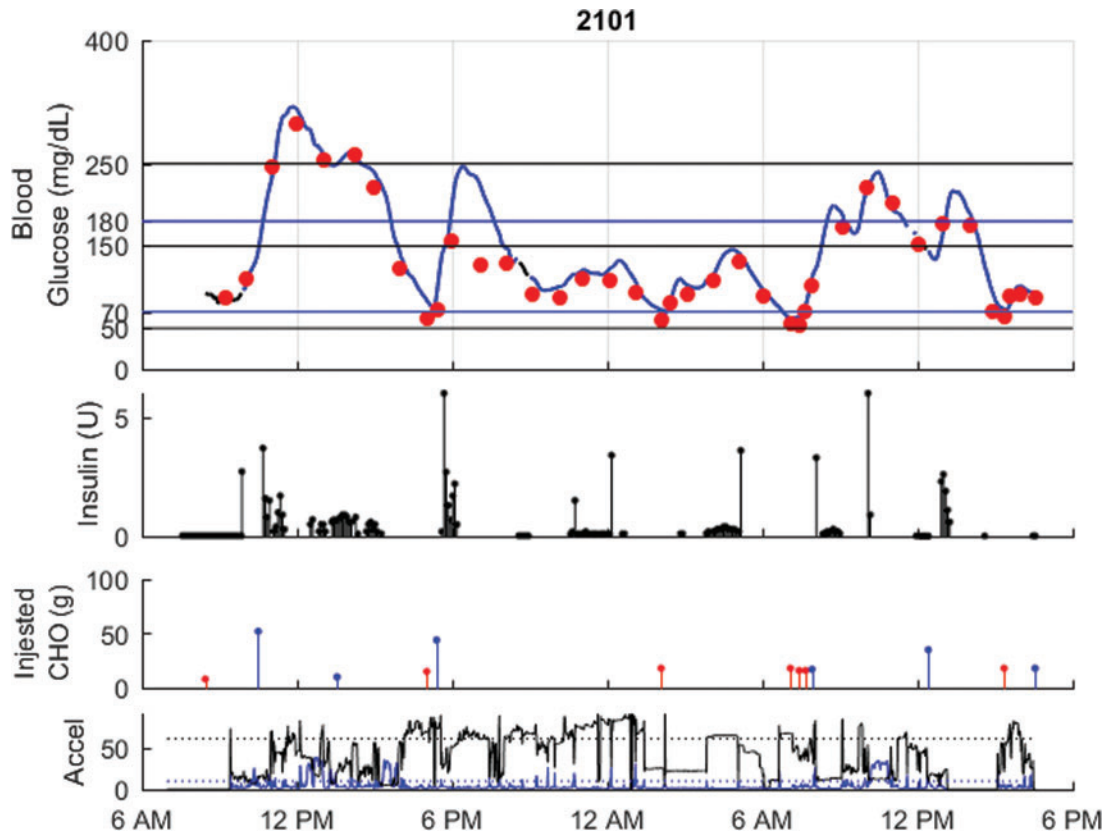

**SUPPLEMENTARY FIG. S1.** Closed-loop performance for subject 2101. Top: Glucose, CGM (black, before CL; blue, during CL), Ref (solid circles). Second: Insulin delivered. Third: Carbs, intervention (red) and meals (blue). Bottom: Accelerometer orientation (black, >60 indicates sleep) and activity (blue, >10 indicates exercise). This subject started with low blood glucose, requiring carbohydrates at 9:30 AM, before closed loop. Detecting sleep using an accelerometer worked poorly, leading to periods of inappropriately concentrated insulin dosing and two bouts of hypoglycemia overnight.

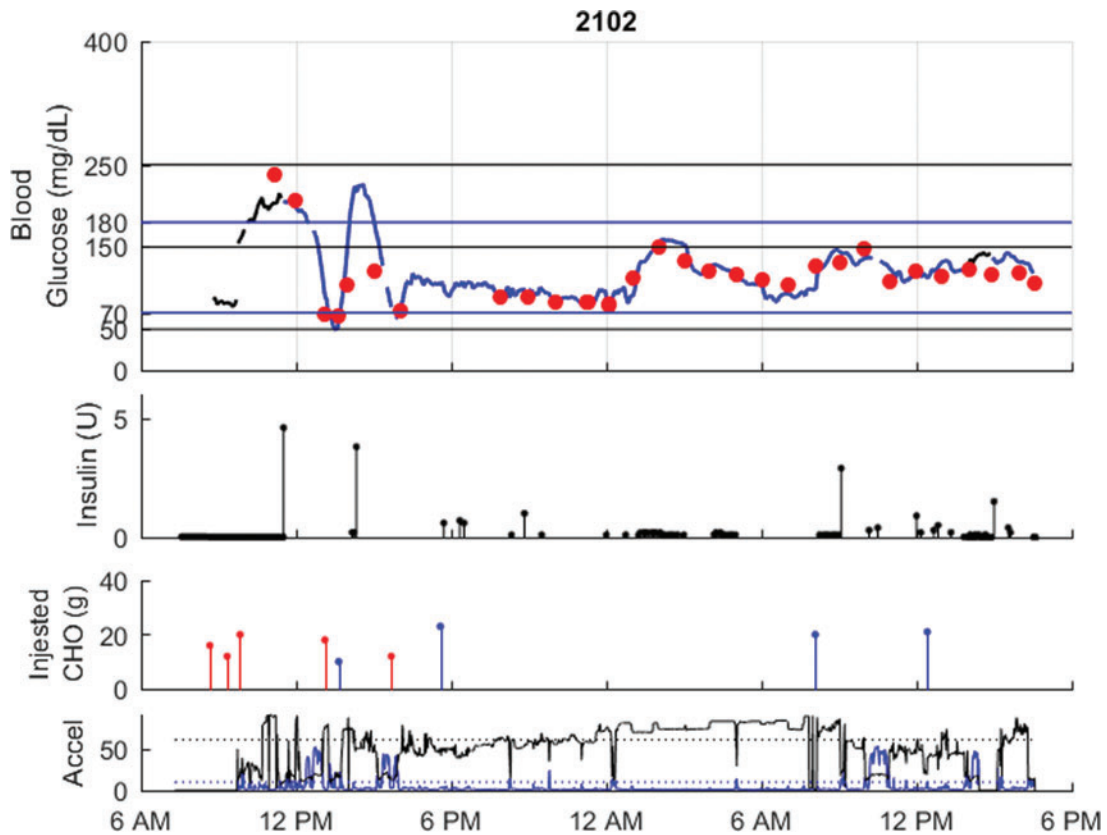

**SUPPLEMENTARY FIG. S2.** Closed-loop performance for subject 2102. Top: Glucose, CGM (black, before CL; blue, during CL), Ref (solid circles). Second: Insulin delivered. Third: Carbs, intervention (red) and meals (blue). Bottom: Accelerometer orientation (black, >60 indicates sleep) and activity (blue, >10 indicates exercise). Subject 2102 normal carbohydrate consumption intentionally averaged 30 g/day. She entered the study low, yet with a high ketone level due to the diet. This required both a carb treatment and insulin, thus the three carb ingestions at around 8:30 AM, as shown in Figure 2. Since the controller was not told about the insulin taken to cover the carbs, it was too aggressive.

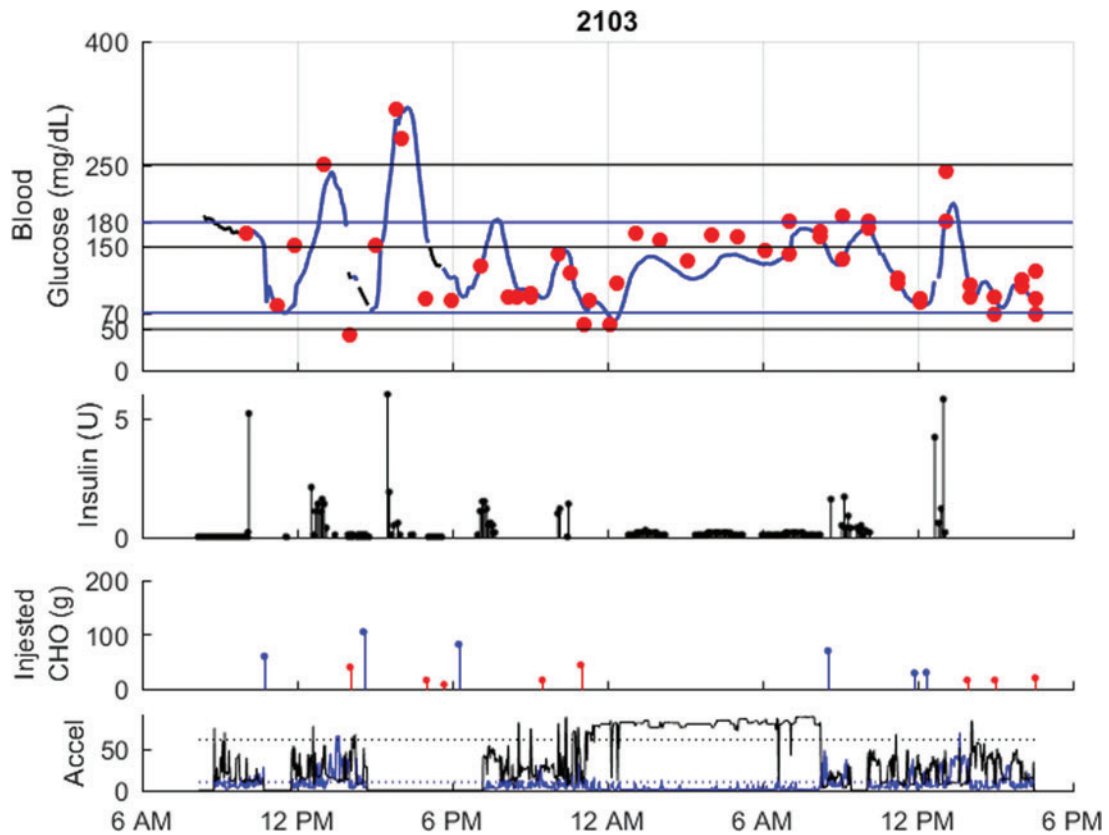

**SUPPLEMENTARY FIG. S3.** Closed-loop performance for subject 2103. Top: Glucose, CGM (black, before CL; blue, during CL), Ref (solid circles). Second: Insulin delivered. Third: Carbs, intervention (red) and meals (blue). Bottom: Accelerometer orientation (black, >60 indicates sleep) and activity (blue, >10 indicates exercise). Subject 2103 experienced very fast rises and falls around meals. This likely caused the controller to overestimate the meal sizes. This patient oscillated into hypoglycemia seven times over the 2-day time periods.

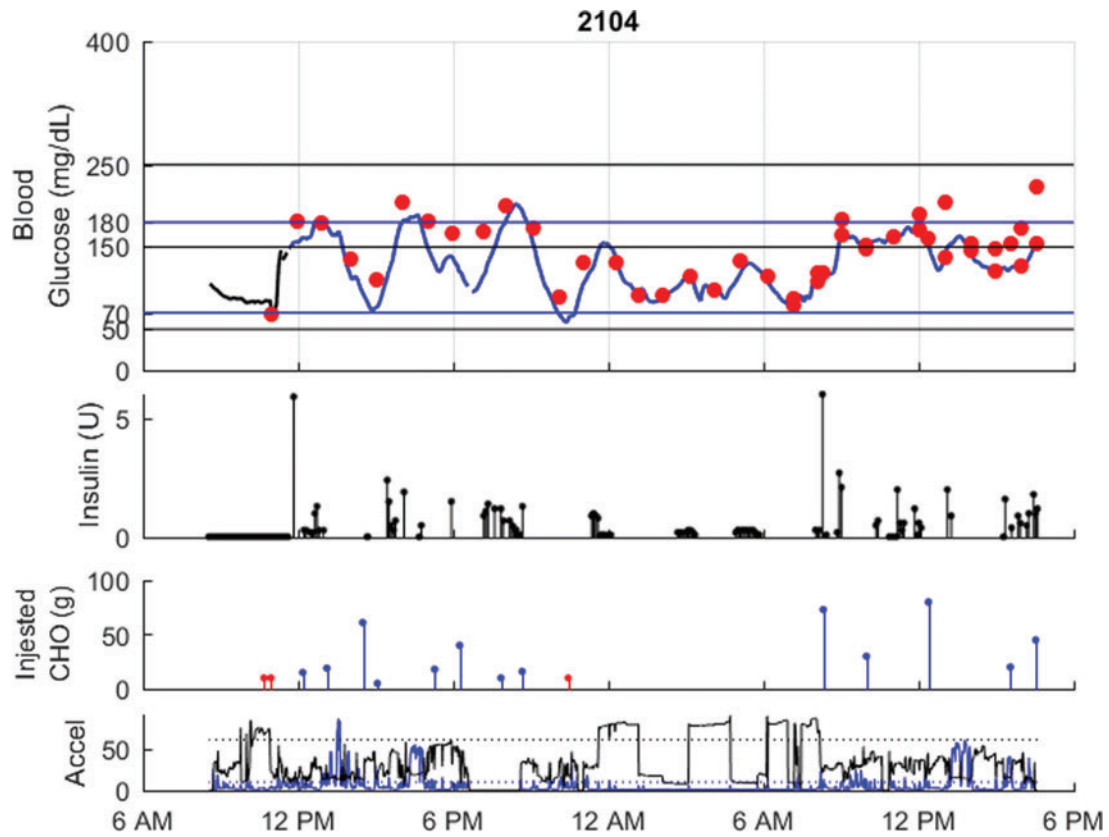

**SUPPLEMENTARY FIG. S4.** Closed-loop performance for subject 2104. Top: Glucose, CGM (black, before CL; blue, during CL), Ref (solid circles). Second: Insulin delivered. Third: Carbs, intervention (red) and meals (blue). Bottom: Accelerometer orientation (black, >60 indicates sleep) and activity (blue, >10 indicates exercise). Subject 2104 received treatment at 11 AM to bring glucose into range to close the loop.

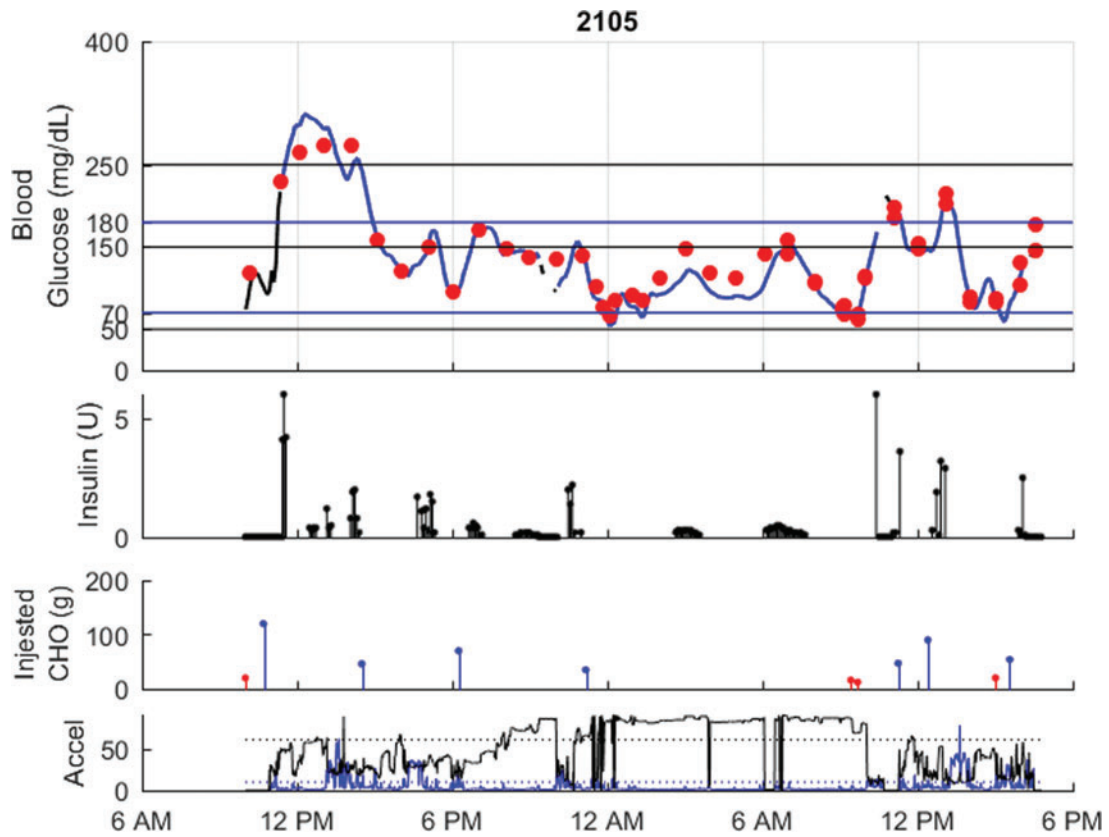

**SUPPLEMENTARY FIG. S5.** Closed-loop performance for subject 2105. Top: Glucose, CGM (black, before CL; blue, during CL), Ref (solid circles). Second: Insulin delivered. Third: Carbs, intervention (red) and meals (blue). Bottom: Accelerometer orientation (black, >60 indicates sleep) and activity (blue, >10 indicates exercise). Subject 2105 received carbs to bring glucose into range before closing the loop.

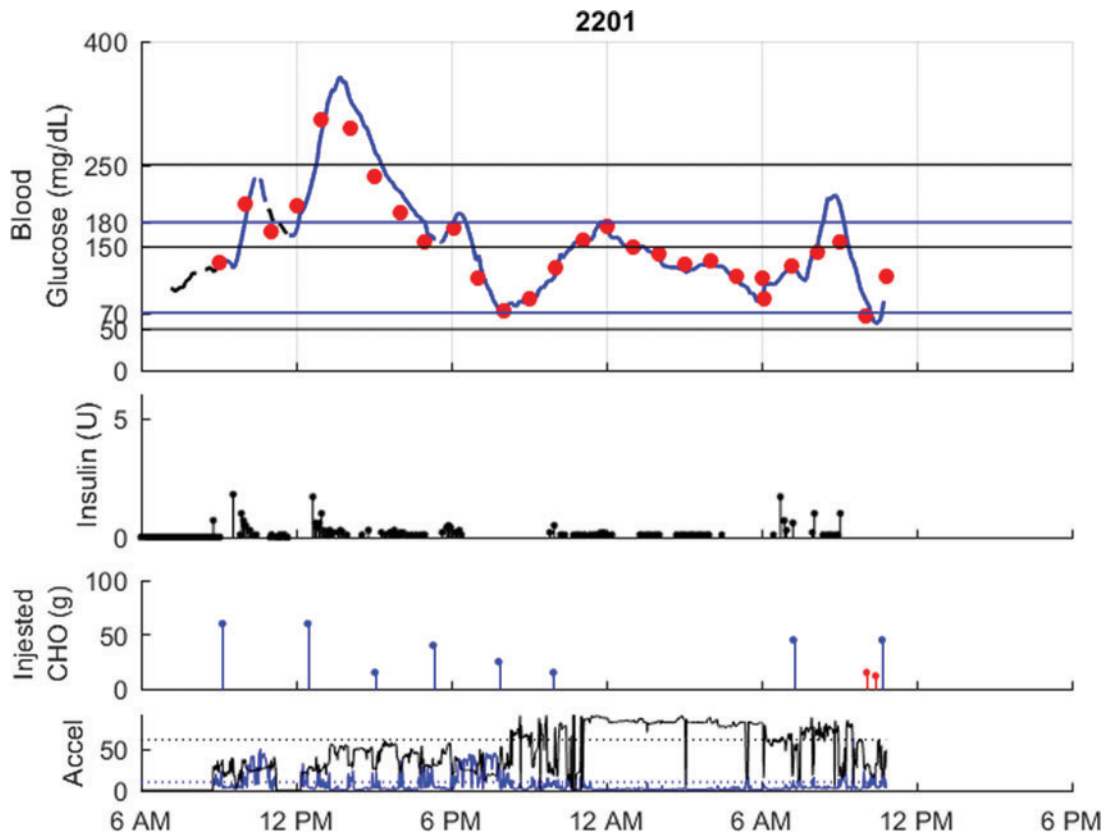

**SUPPLEMENTARY FIG. S6.** Closed-loop performance for subject 2201. Top: Glucose, CGM (black, before CL; blue, during CL), Ref (solid circles). Second: Insulin delivered. Third: Carbs, intervention (red) and meals (blue). Bottom: Accelerometer orientation (black, >60 indicates sleep) and activity (blue, >10 indicates exercise). Due to equipment malfunctions, subject 2201 spent a lot of time out of closed loop initially.

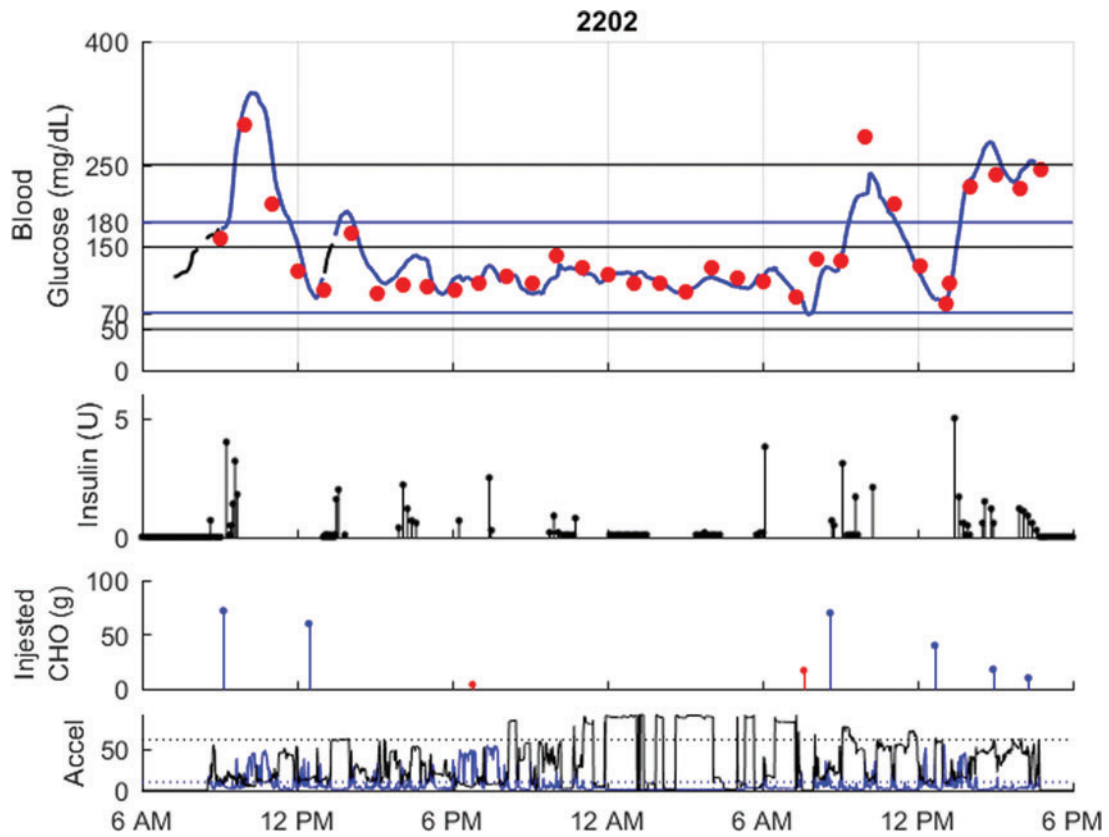

**SUPPLEMENTARY FIG. S7.** Closed-loop performance for subject 2202. Top: Glucose, CGM (black, before CL; blue, during CL), Ref (solid circles). Second: Insulin delivered. Third: Carbs, intervention (red) and meals (blue). Bottom: Accelerometer orientation (black, >60 indicates sleep) and activity (blue, >10 indicates exercise). This subject experienced a failure of the activity monitor to detect sleep leading to an inappropriately large bolus before breakfast on the second day.

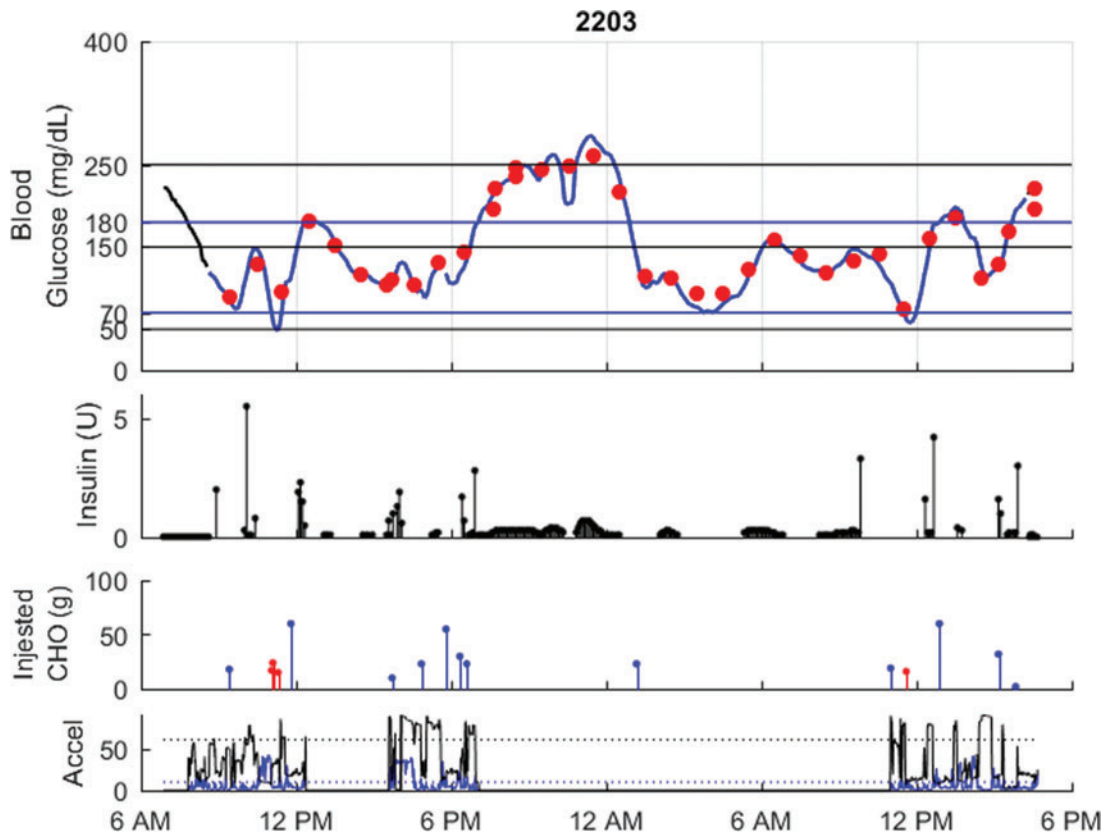

**SUPPLEMENTARY FIG. S8.** Closed-loop performance for subject 2203. Top: Glucose, CGM (black, before CL; blue, during CL), Ref (solid circles). Second: Insulin delivered. Third: Carbs, intervention (red) and meals (blue). Bottom: Accelerometer orientation (black, >60 indicates sleep) and activity (blue, >10 indicates exercise). The patient's basal rates were reset down to 53% of TDD (1.0 U/h) instead of 80% of TDD after the first hypoglycemic event. This individual went to sleep right after dinner on the first day blunting the response to dinner. She naturally woke up at 1 AM and snacked. A late wakeup the next day and an improperly set wakeup time led to an inappropriately large bolus at 9:30 AM and a hypoglycemic event.



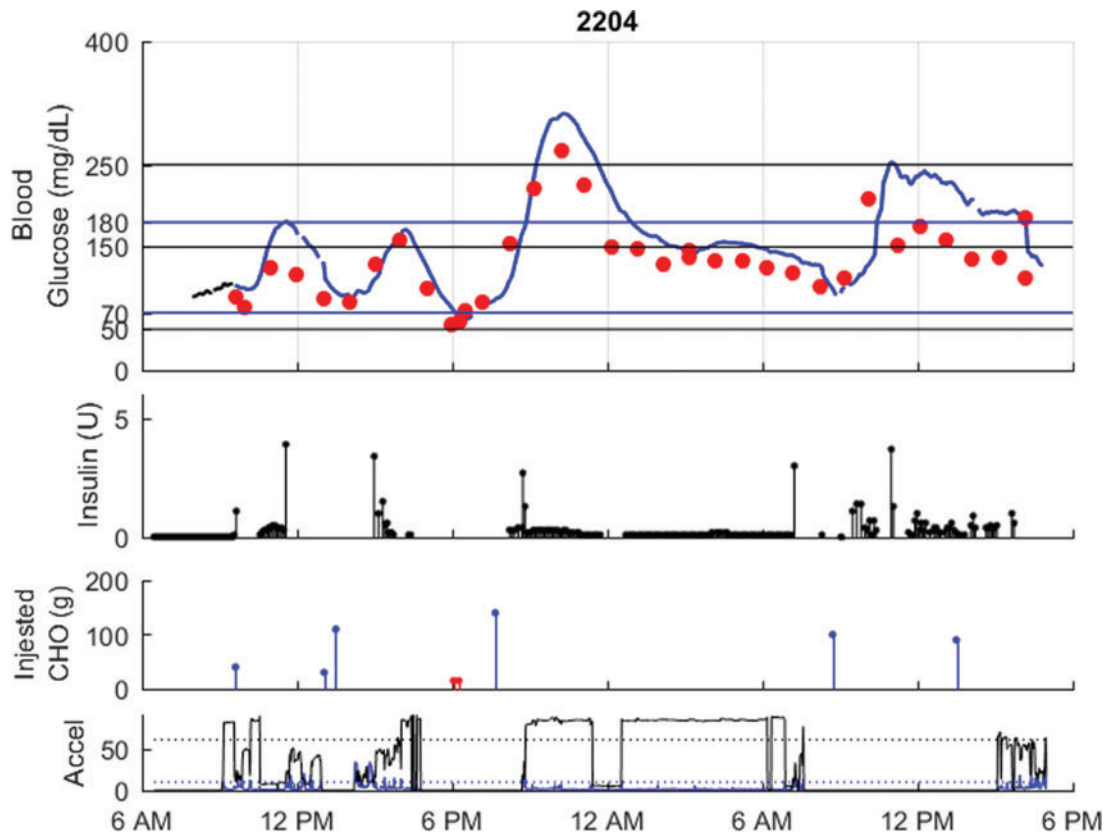

**SUPPLEMENTARY FIG. S9.** Closed-loop performance for subject 2204. Top: Glucose, CGM (black, before CL; blue, during CL), Ref (solid circles). Second: Insulin delivered. Third: Carbs, intervention (red) and meals (blue). Bottom: Accelerometer orientation (black, >60 indicates sleep) and activity (blue, >10 indicates exercise). Dinner was a carrot cake and a mountain dew.

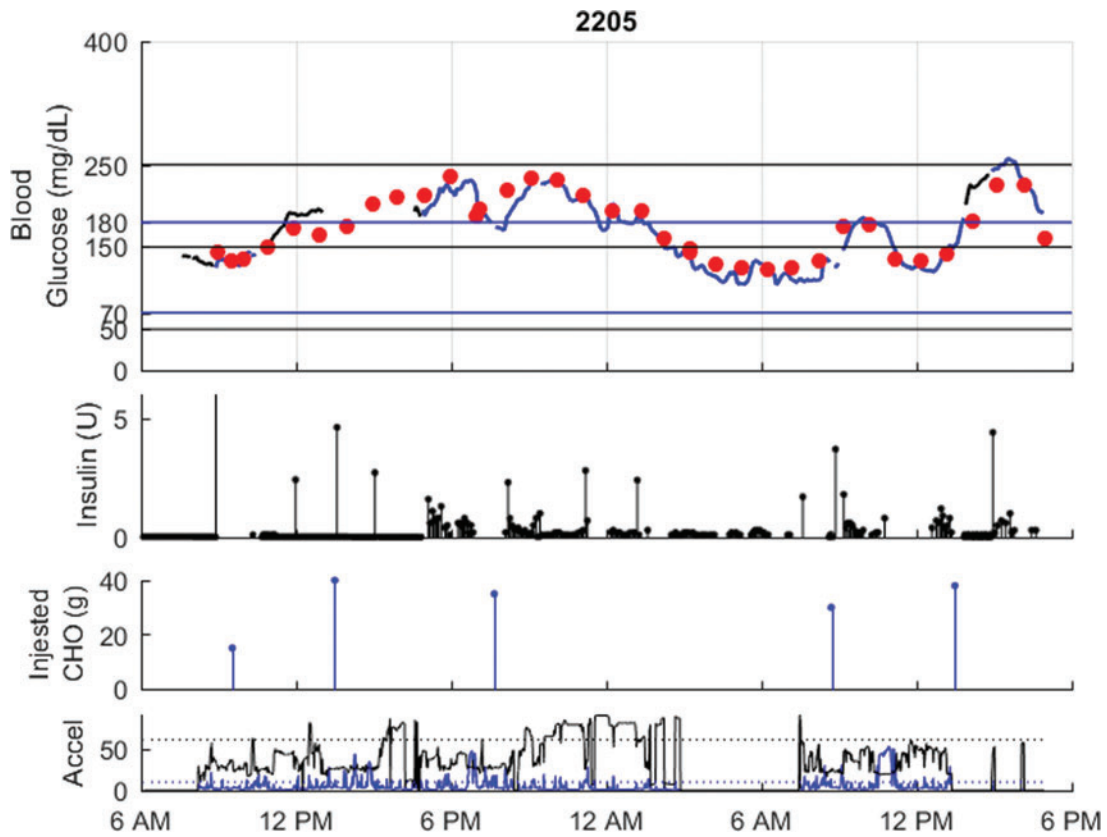

**SUPPLEMENTARY FIG. S10.** Closed-loop performance for subject 2205. Top: Glucose, CGM (black, before CL; blue, during CL), Ref (solid circles). Second: Insulin delivered. Third: Carbs, intervention (red) and meals (blue). Bottom: Accelerometer orientation (black, >60 indicates sleep) and activity (blue, >10 indicates exercise). The early breaks from closed loop were caused by equipment malfunctions.

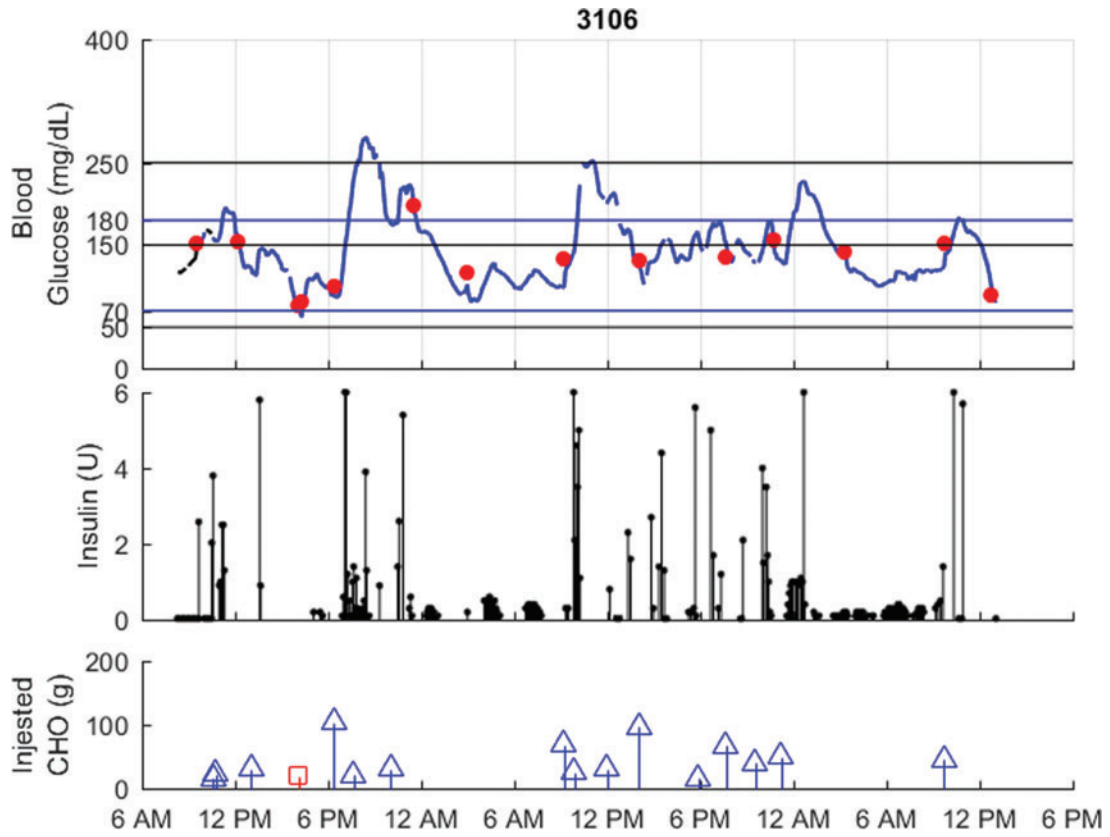

**SUPPLEMENTARY FIG. S11.** Closed-loop performance for subject 3106. Top: Glucose, CGM (black, before CL; blue, during CL), Ref (solid circles). Second: Insulin delivered. Third: Carbs, intervention (red) and meals (blue). Bottom: Accelerometer orientation (black, >60 indicates sleep) and activity (blue, >10 indicates exercise).

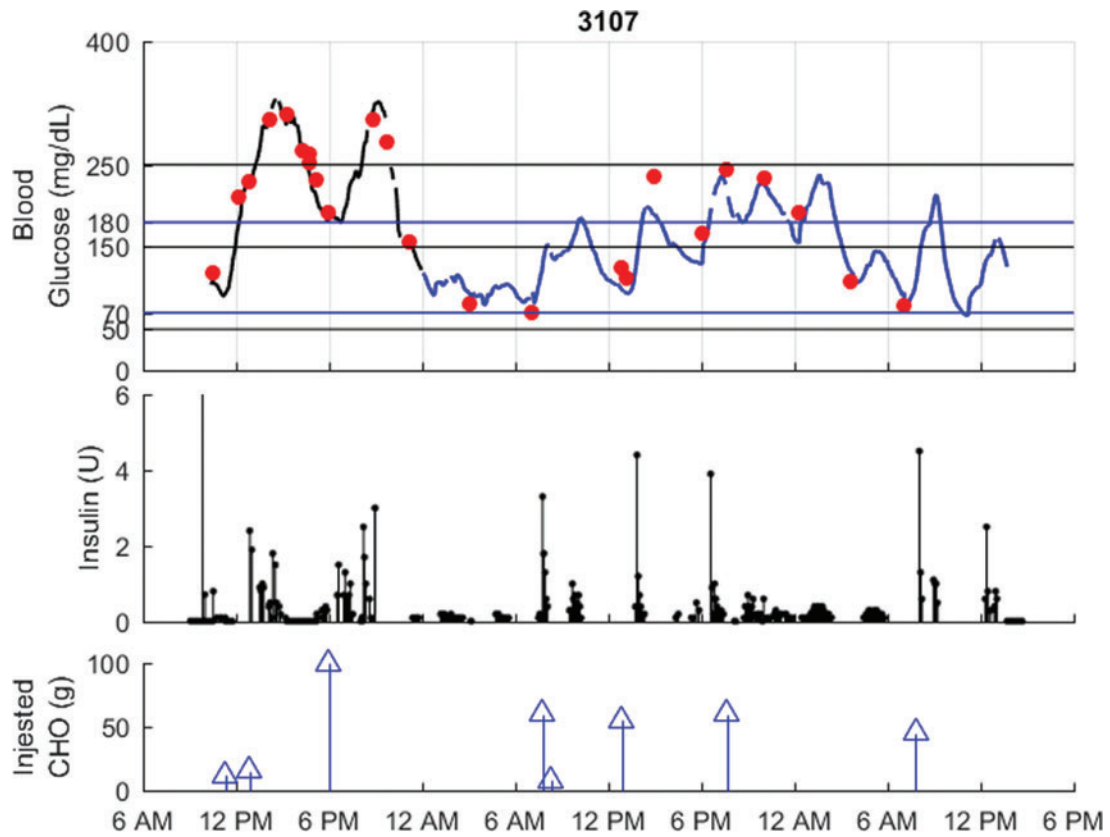

**SUPPLEMENTARY FIG. S12.** Closed-loop performance for subject 3107. Top: Glucose, CGM (black, before CL; blue, during CL), Ref (solid circles). Second: Insulin delivered. Third: Carbs, intervention (red) and meals (blue). Bottom: Accelerometer orientation (black, >60 indicates sleep) and activity (blue, >10 indicates exercise).

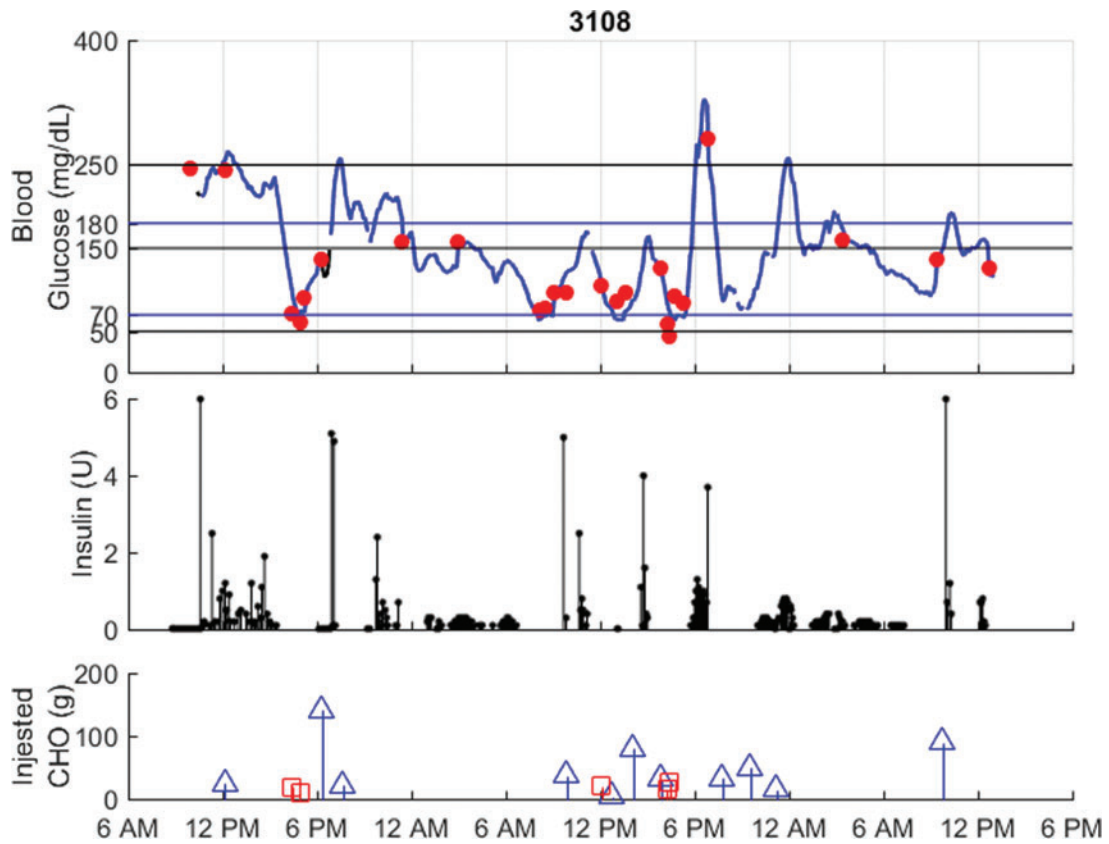

**SUPPLEMENTARY FIG. S13.** Closed-loop performance for subject 3108. Top: Glucose, CGM (black, before CL; blue, during CL), Ref (solid circles). Second: Insulin delivered. Third: Carbs, intervention (red) and meals (blue). Bottom: Accelerometer orientation (black, >60 indicates sleep) and activity (blue, >10 indicates exercise).

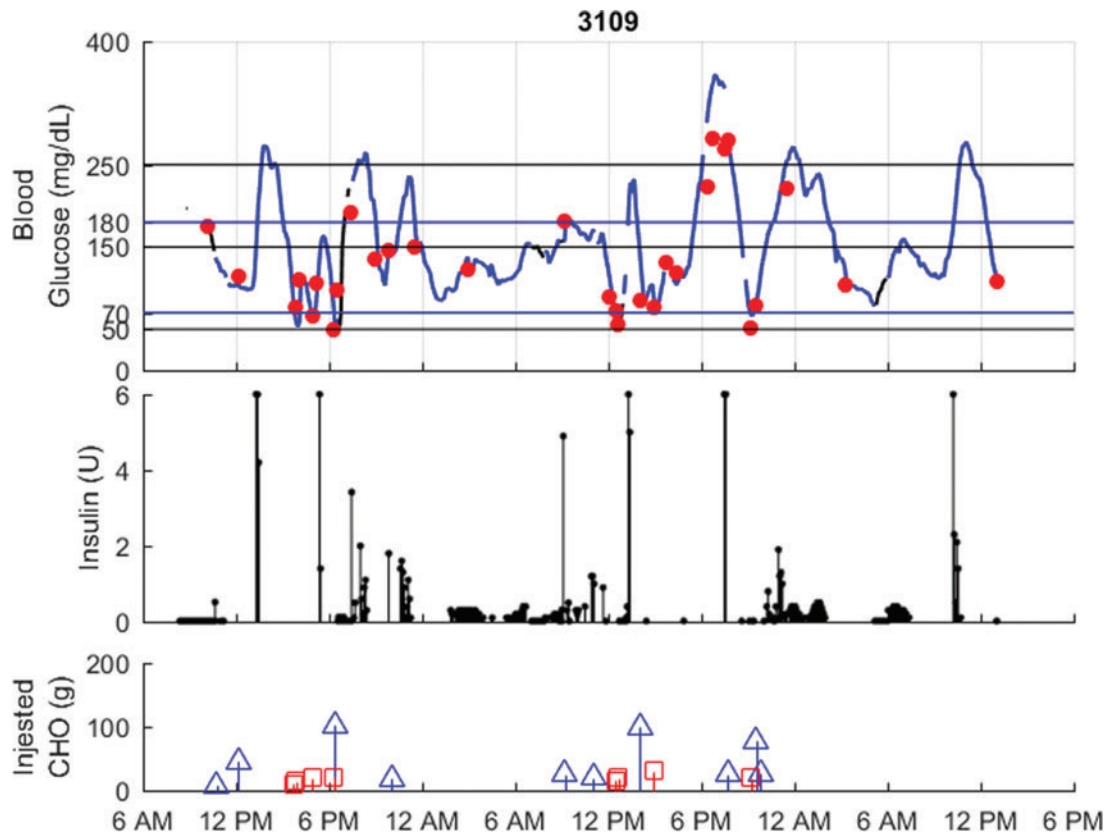

**SUPPLEMENTARY FIG. S14.** Closed-loop performance for subject 3109. Top: Glucose, CGM (black, before CL; blue, during CL), Ref (solid circles). Second: Insulin delivered. Third: Carbs, intervention (red) and meals (blue). Bottom: Accelerometer orientation (black, >60 indicates sleep) and activity (blue, >10 indicates exercise).

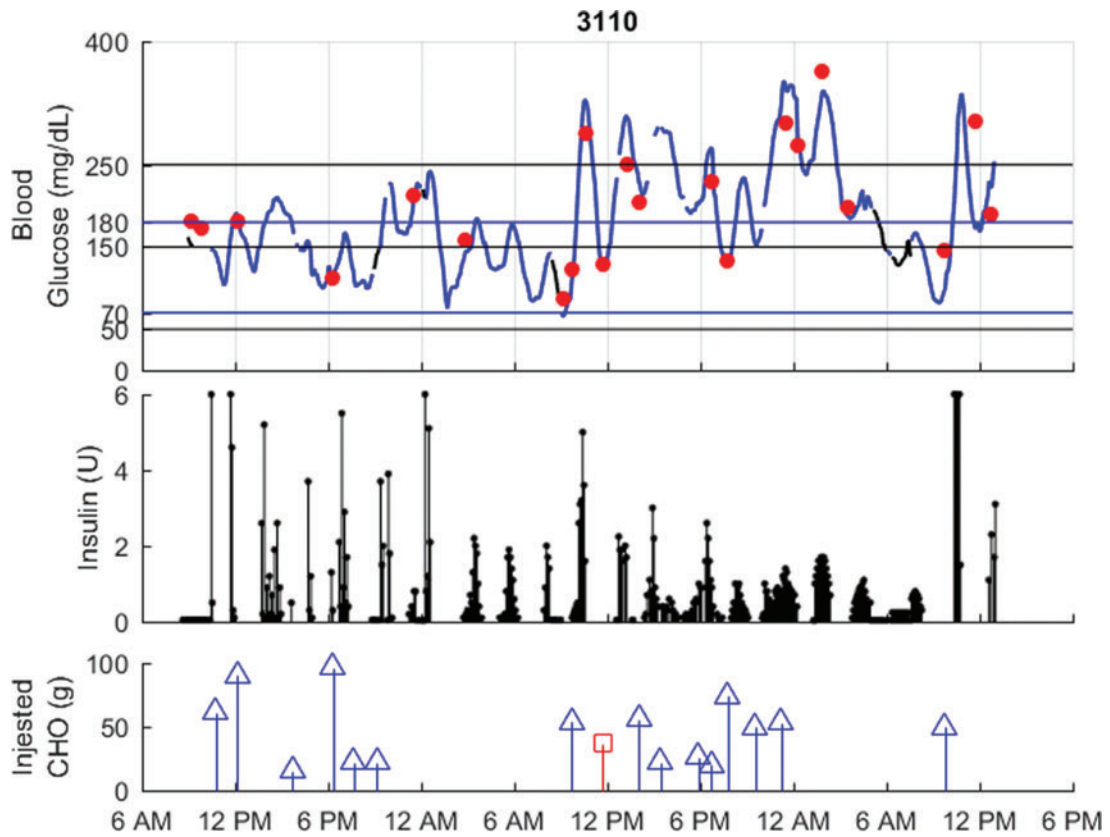

**SUPPLEMENTARY FIG. S15.** Closed-loop performance for subject 3110. Top: Glucose, CGM (black, before CL; blue, during CL), Ref (solid circles). Second: Insulin delivered. Third: Carbs, intervention (red) and meals (blue). Bottom: Accelerometer orientation (black, >60 indicates sleep) and activity (blue, >10 indicates exercise).

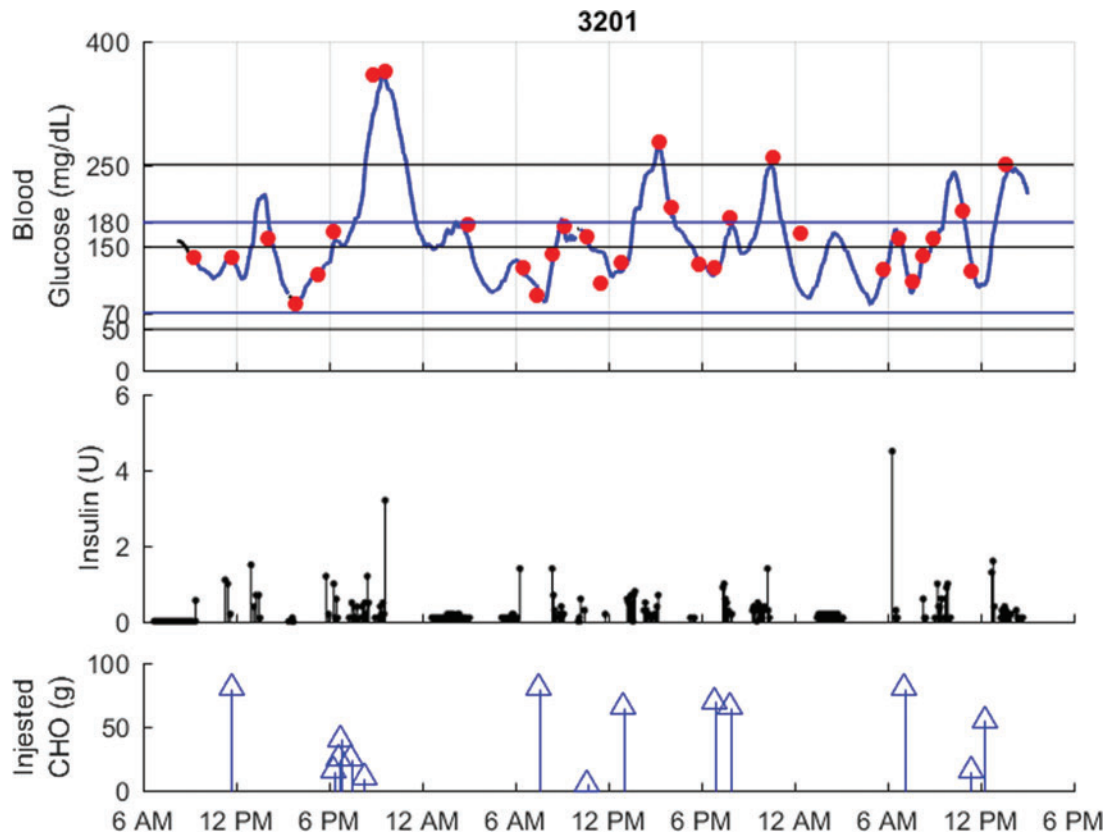

**SUPPLEMENTARY FIG. S16.** Closed-loop performance for subject 3201. Top: Glucose, CGM (black, before CL; blue, during CL), Ref (solid circles). Second: Insulin delivered. Third: Carbs, intervention (red) and meals (blue). Bottom: Accelerometer orientation (black, >60 indicates sleep) and activity (blue, >10 indicates exercise).



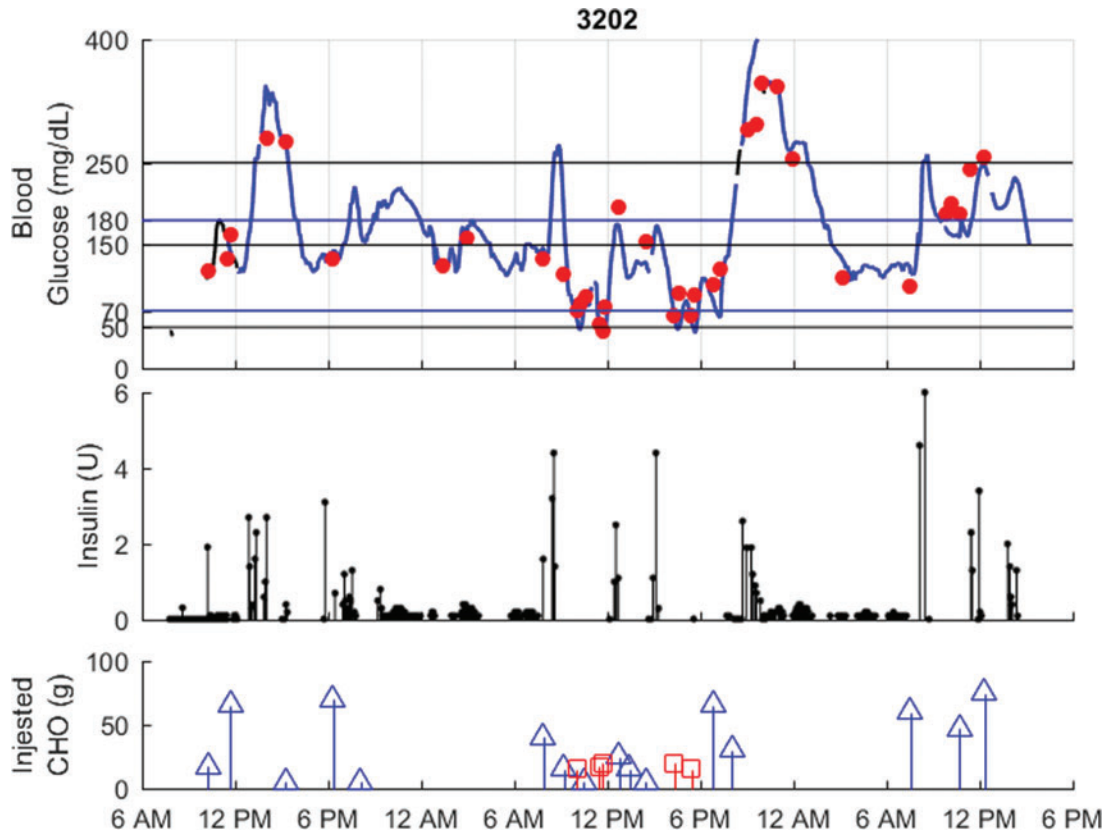

**SUPPLEMENTARY FIG. S17.** Closed-loop performance for subject 3202. Top: Glucose, CGM (black, before CL; blue, during CL), Ref (solid circles). Second: Insulin delivered. Third: Carbs, intervention (red) and meals (blue). Bottom: Accelerometer orientation (black, >60 indicates sleep) and activity (blue, >10 indicates exercise).

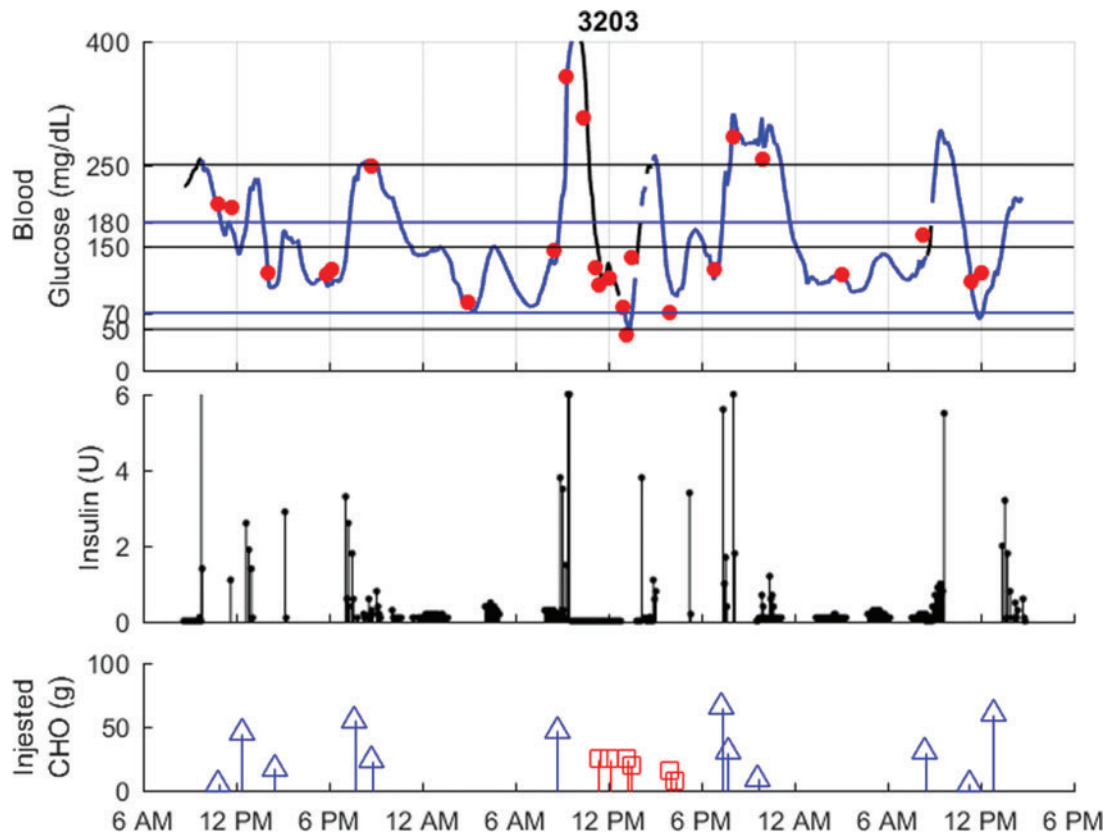

**SUPPLEMENTARY FIG. S18.** Closed-loop performance for subject 3203. Top: Glucose, CGM (black, before CL; blue, during CL), Ref (solid circles). Second: Insulin delivered. Third: Carbs, intervention (red) and meals (blue). Bottom: Accelerometer orientation (black, >60 indicates sleep) and activity (blue, >10 indicates exercise). At the second breakfast, a calibration was entered into the Dexcom with a rapid rate of change that was not communicated to the controller. This led to a large overestimation of the meal size and too much insulin delivery.

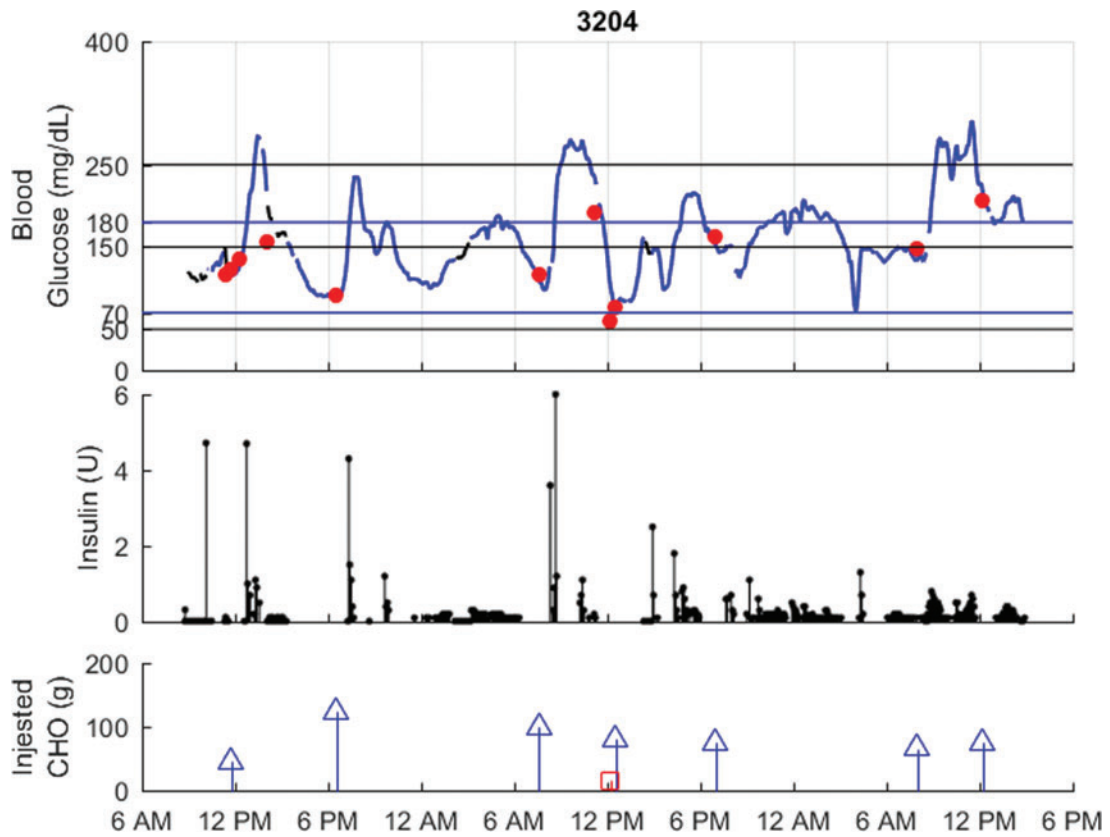

**SUPPLEMENTARY FIG. S19.** Closed-loop performance for subject 3204JB. Top: Glucose, CGM (black, before CL; blue, during CL), Ref (solid circles). Second: Insulin delivered. Third: Carbs, intervention (red) and meals (blue). Bottom: Accelerometer orientation (black, >60 indicates sleep) and activity (blue, >10 indicates exercise).

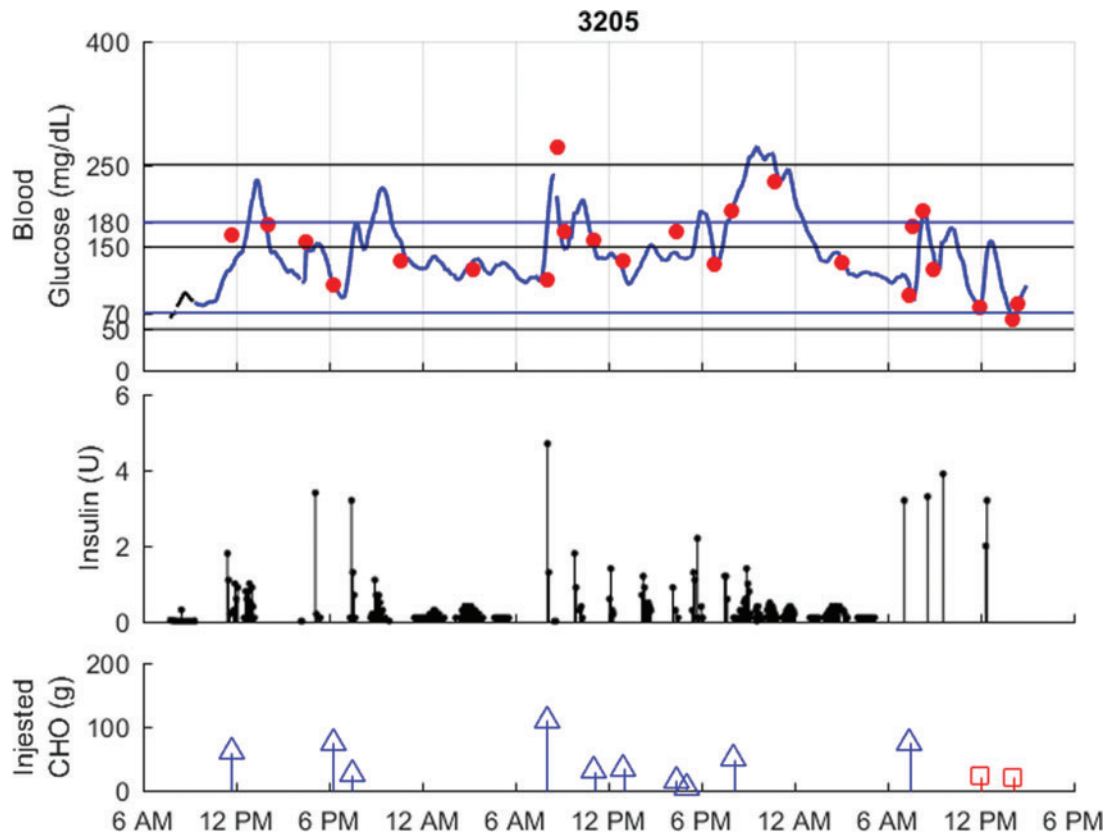

**SUPPLEMENTARY FIG. S20.** Closed-loop performance for subject 3205KK. Top: Glucose, CGM (black, before CL; blue, during CL), Ref (solid circles). Second: Insulin delivered. Third: Carbs, intervention (red) and meals (blue). Bottom: Accelerometer orientation (black, >60 indicates sleep) and activity (blue, >10 indicates exercise).

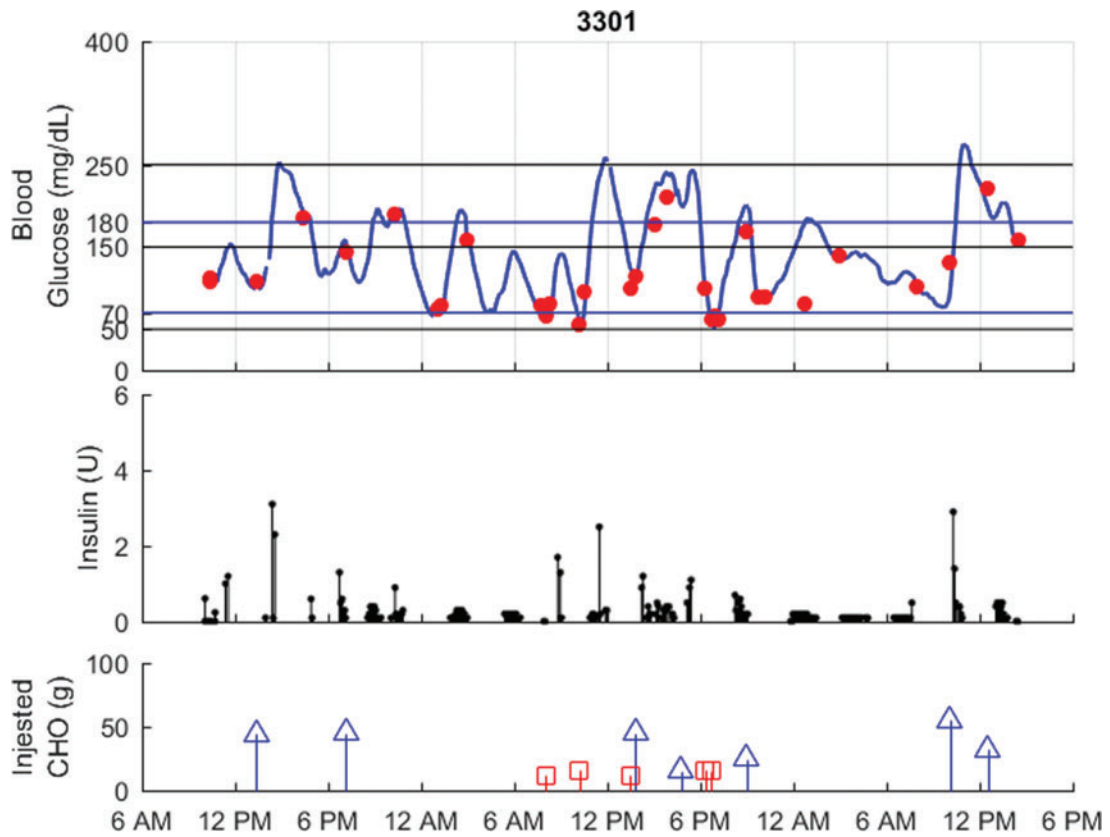

**SUPPLEMENTARY FIG. S21.** Closed-loop performance for subject 3301. Top: Glucose, CGM (black, before CL; blue, during CL), Ref (solid circles). Second: Insulin delivered. Third: Carbs, intervention (red) and meals (blue). Bottom: Accelerometer orientation (black, >60 indicates sleep) and activity (blue, >10 indicates exercise).

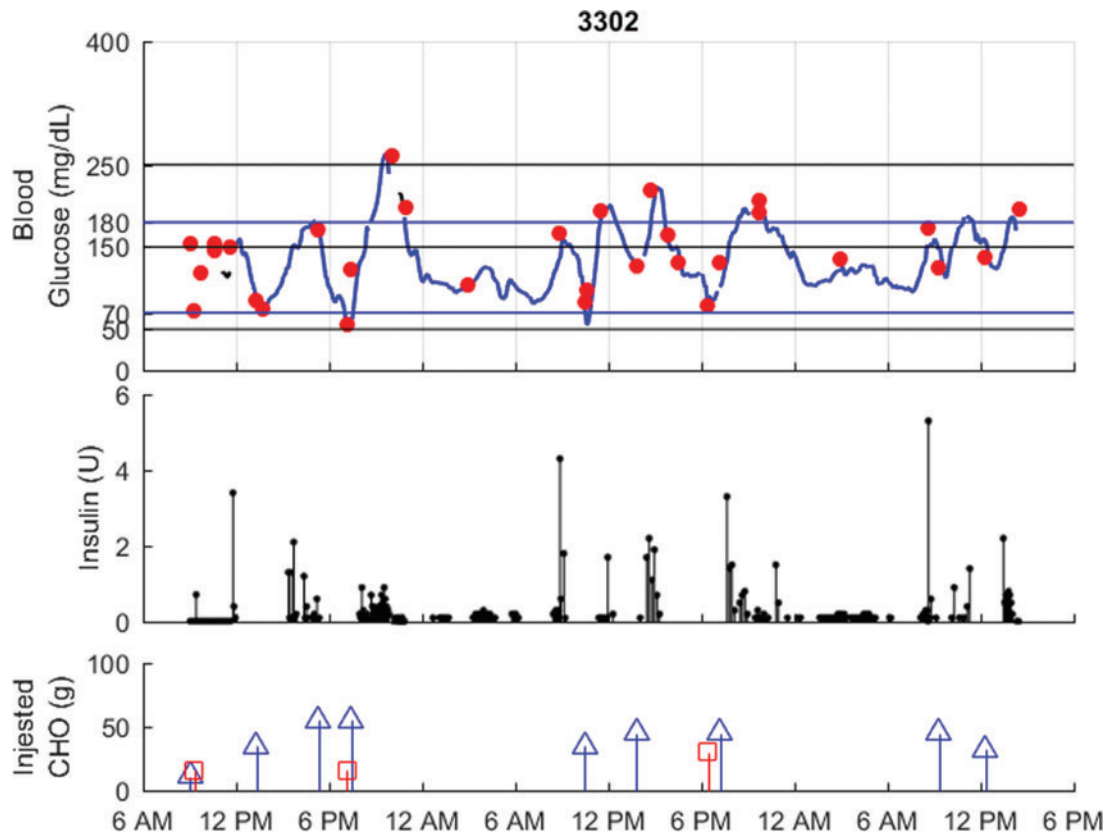

**SUPPLEMENTARY FIG. S22.** Closed-loop performance for subject 3302. Top: Glucose, CGM (black, before CL; blue, during CL), Ref (solid circles). Second: Insulin delivered. Third: Carbs, intervention (red) and meals (blue). Bottom: Accelerometer orientation (black, >60 indicates sleep) and activity (blue, >10 indicates exercise).

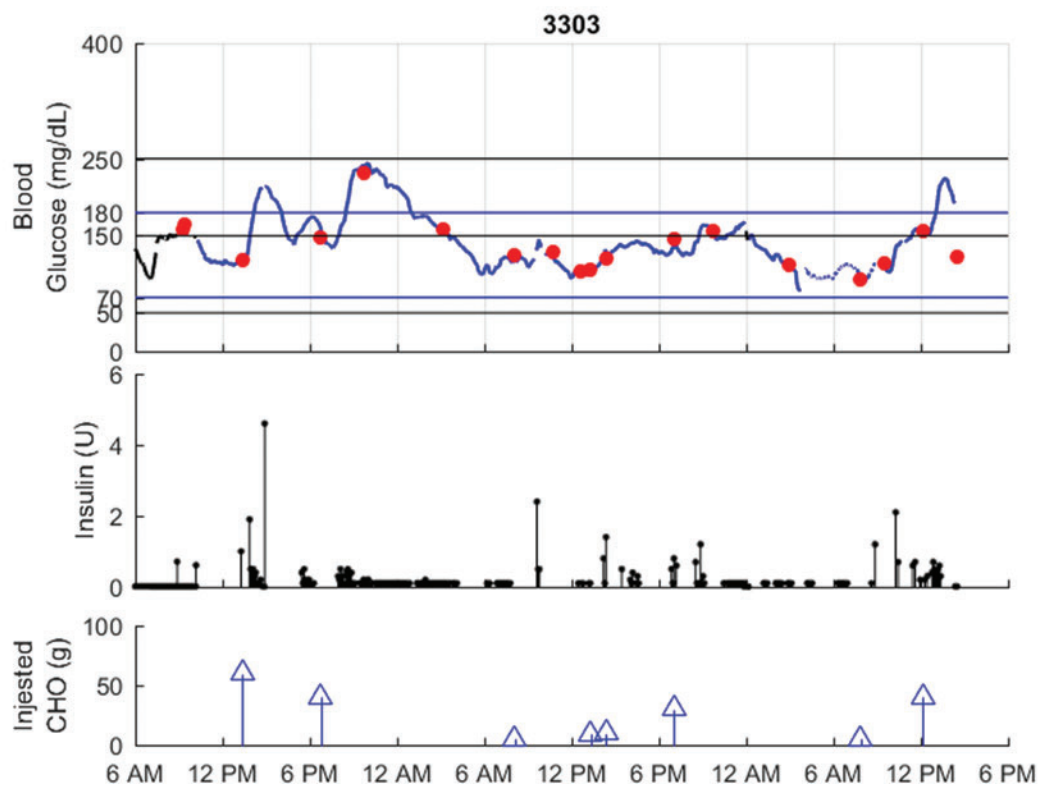

**SUPPLEMENTARY FIG. S23.** Closed-loop performance for subject 3303. Top: Glucose, CGM (black, before CL; blue, during CL), Ref (solid circles). Second: Insulin delivered. Third: Carbs, intervention (red) and meals (blue). Bottom: Accelerometer orientation (black, >60 indicates sleep) and activity (blue, >10 indicates exercise).

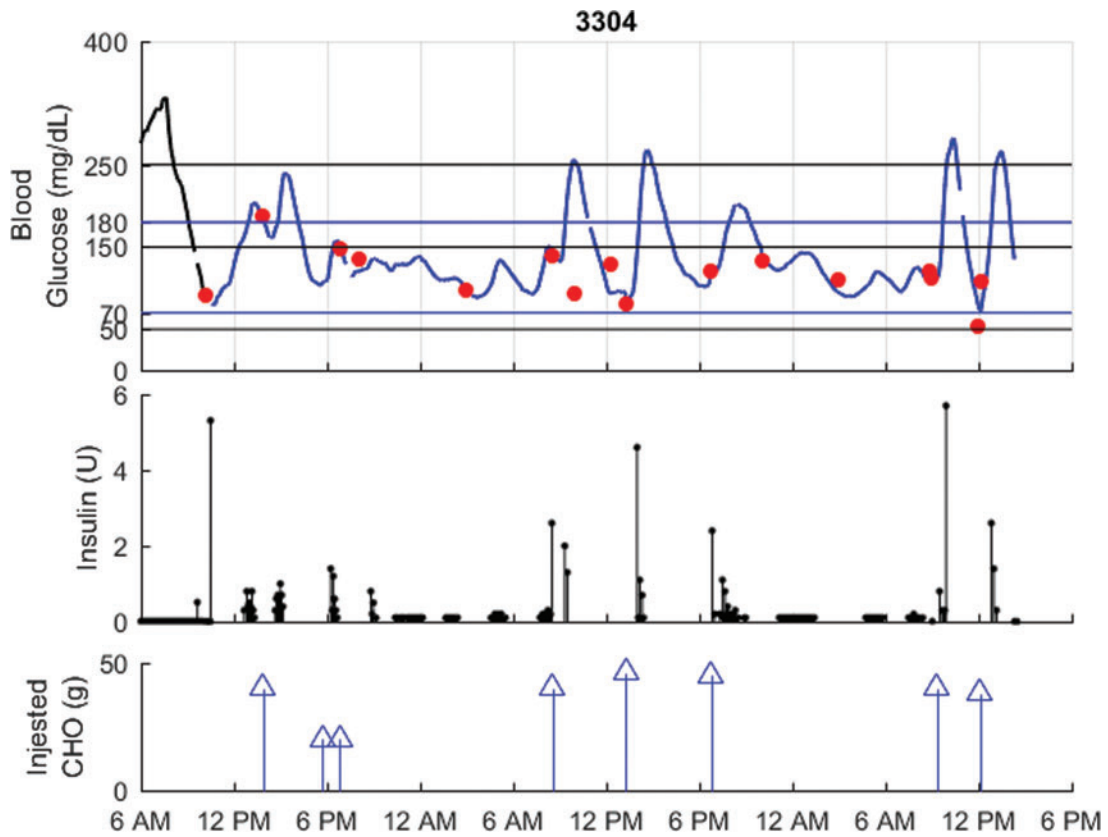

**SUPPLEMENTARY FIG. S24.** Closed-loop performance for subject 3304. Top: Glucose, CGM (black, before CL; blue, during CL), Ref (solid circles). Second: Insulin delivered. Third: Carbs, intervention (red) and meals (blue). Bottom: Accelerometer orientation (black, >60 indicates sleep) and activity (blue, >10 indicates exercise).



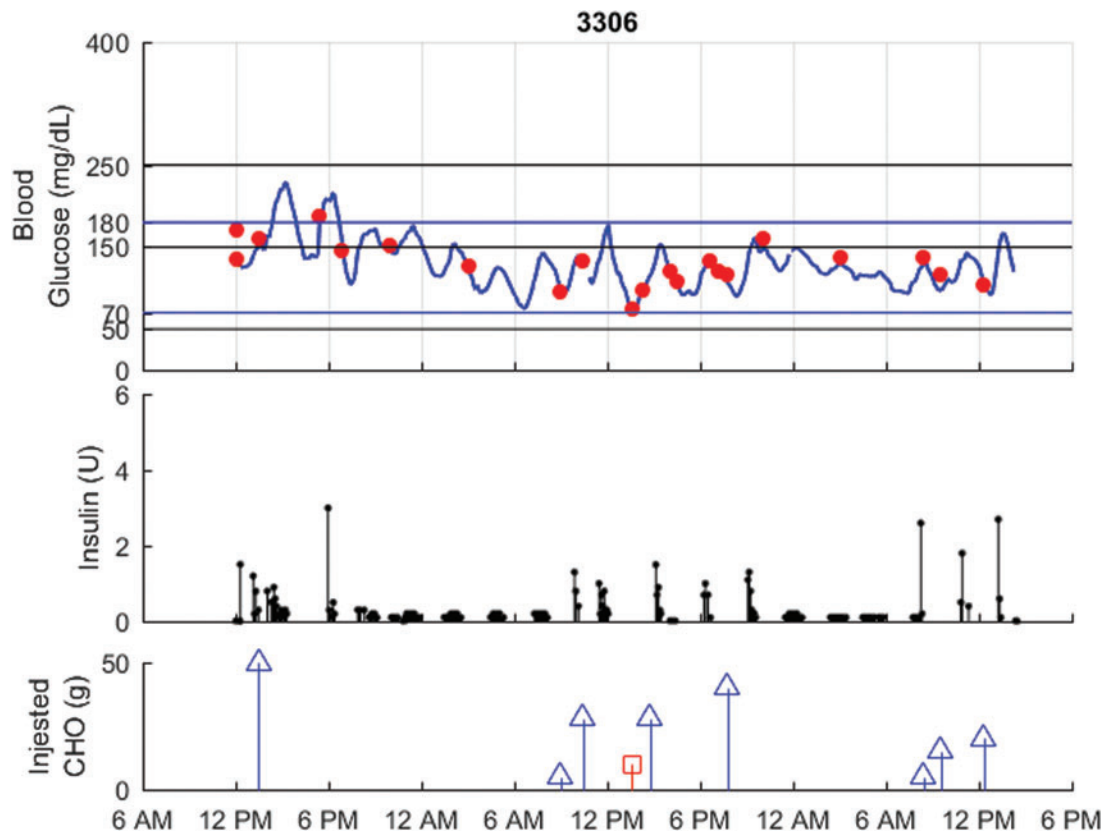

**SUPPLEMENTARY FIG. S25.** Closed-loop performance for subject 3306. Top: Glucose, CGM (black, before CL; blue, during CL), Ref (solid circles). Second: Insulin delivered. Third: Carbohydrates, intervention (red) and meals (blue). Bottom: Accelerometer orientation (black, >60 indicates sleep) and activity (blue, >10 indicates exercise).

SUPPLEMENTARY TABLE S1. SUBJECT DEMOGRAPHICS

| <i>Subject</i> | <i>Age (years)</i> | <i>Sex</i> | <i>Race</i> | <i>T1D (years)</i> | <i>Daily insulin (U)</i> | <i>A1c (%)</i> | <i>Weight (kg)</i> | <i>U/kg/Day</i> |
|----------------|--------------------|------------|-------------|--------------------|--------------------------|----------------|--------------------|-----------------|
| 2101           | 29                 | F          | White       | 8.9                | 56                       | 8.7            | 59                 | 0.94            |
| 2102           | 22                 | F          | White       | 7.9                | 27                       | 5.7            | 71                 | 0.38            |
| 2103           | 31                 | M          | White       | 15                 | 43                       | 8.5            | 77                 | 0.56            |
| 2104           | 32                 | F          | White       | 14                 | 49                       | 6.7            | 61                 | 0.81            |
| 2105           | 31                 | F          | White       | 14                 | 66                       | 6.9            | 63                 | 1.05            |
| 2201           | 48                 | F          | White       | 30                 | 26                       | 6.2            | 64                 | 0.40            |
| 2202           | 26                 | F          | White       | 8.5                | 38                       | 5.8            | 62                 | 0.62            |
| 2203           | 18                 | F          | White       | 7.5                | 45                       | 8.7            | 67                 | 0.67            |
| 2204           | 42                 | M          | White       | 4.8                | 42                       | 6.4            | 99                 | 0.42            |
| 2205           | 24                 | F          | White       | 6.8                | 45                       | 6.8            | 76                 | 0.59            |
| Mean/SD        | 30/9               |            |             | 11/7               | 44/12                    | 7.0/1.2        | 70/12              | 0.65/0.23       |
| 3106           | 14                 | F          | White       | 2                  | 92                       | 7.4            | 77                 | 1.19            |
| 3107           | 30                 | F          | White       | 15                 | 45                       | 6.2            | 69                 | 0.65            |
| 3108           | 16                 | F          | White       | 11                 | 50                       | 6.9            | 56                 | 0.89            |
| 3109           | 14                 | F          | White       | 13                 | 57                       | 8.8            | 50                 | 1.14            |
| 3110           | 16                 | F          | White       | 7.5                | 122                      | 8.6            | 70                 | 1.74            |
| 3201           | 48                 | F          | White       | 30                 | 26                       | 6.2            | 64                 | 0.40            |
| 3202           | 26                 | F          | White       | 8.5                | 38                       | 5.8            | 62                 | 0.62            |
| 3203           | 18                 | F          | White       | 7.5                | 45                       | 8.7            | 67                 | 0.67            |
| 3204           | 42                 | M          | White       | 4.8                | 42                       | 6.4            | 99                 | 0.42            |
| 3205           | 24                 | F          | White       | 6.8                | 45                       | 6.8            | 76                 | 0.59            |
| 3301           | 42                 | F          | White       | 36                 | 24                       | 6.3            | 66                 | 0.36            |
| 3302           | 27                 | M          | White       | 25                 | 46                       | 6.2            | 84                 | 0.55            |
| 3303           | 51                 | F          | White       | 44                 | 27                       | 7.4            | 57                 | 0.48            |
| 3304           | 44                 | F          | White       | 34                 | 31                       | 5.8            | 68                 | 0.45            |
| 3306           | 41                 | F          | White       | 29                 | 31                       | 7.8            | 63                 | 0.50            |
| Mean/SD        | 30/13              |            |             | 18/13              | 48/26                    | 7.0/1.1        | 68/12              | 0.71/0.38       |

T1D, type 1 diabetes.

SUPPLEMENTARY TABLE S2. PATIENT-LEVEL 24-H ADJUSTED RESULTS

| <i>Subject</i> | <i>Mean<br/>(mg/dL)</i> | <i>CGM&lt;50<br/>(%)</i> | <i>50&lt;CGM&lt;70<br/>(%)</i> | <i>70&lt;CGM&lt;180<br/>(%)</i> | <i>180&lt;CGM&lt;250<br/>(%)</i> | <i>250&lt;CGM<br/>(%)</i> | <i>Daily insulin<br/>(U)</i> |
|----------------|-------------------------|--------------------------|--------------------------------|---------------------------------|----------------------------------|---------------------------|------------------------------|
| 2101           | 147                     | 0                        | 3.17                           | 69.1                            | 20.4                             | 7.28                      | 57.9                         |
| 2102           | 117                     | 0.17                     | 1.26                           | 92.7                            | 5.86                             | 0                         | 20.6                         |
| 2103           | 131                     | 0                        | 1.77                           | 89.8                            | 6.01                             | 2.44                      | 47.8                         |
| 2104           | 126                     | 0                        | 2.81                           | 91.0                            | 6.17                             | 0                         | 53.5                         |
| 2105           | 129                     | 0                        | 6.74                           | 82.4                            | 5.79                             | 5.10                      | 57.1                         |
| 2201           | 161                     | 0                        | 1.01                           | 70.9                            | 17.3                             | 10.8                      | 26.8                         |
| 2202           | 133                     | 0                        | 1.04                           | 83.1                            | 10.2                             | 5.59                      | 36.6                         |
| 2203           | 151                     | 0.17                     | 1.57                           | 70.2                            | 19.7                             | 8.35                      | 50.8                         |
| 2204           | 161                     | 0                        | 2.87                           | 67.9                            | 18.6                             | 10.7                      | 47.5                         |
| 2205           | 169                     | 0                        | 0                              | 59.3                            | 38.9                             | 1.82                      | 67.1                         |
| Mean           | 142                     | 0.03                     | 2.22                           | 77.6                            | 14.9                             | 5.20                      | 46.6                         |
| 3106           | 144                     | 0                        | 0.35                           | 82.1                            | 13.9                             | 3.40                      | 86.1                         |
| 3107           | 151                     | 0                        | 0.87                           | 66.5                            | 31.5                             | 0                         | 47.0                         |
| 3108           | 151                     | 0                        | 4.53                           | 67.9                            | 21.2                             | 5.55                      | 54.2                         |
| 3109           | 160                     | 0.17                     | 1.45                           | 68.3                            | 17.9                             | 11.2                      | 60.9                         |
| 3110           | 183                     | 0                        | 0.35                           | 53.1                            | 29.0                             | 17.1                      | 134                          |
| 3201           | 158                     | 0                        | 0                              | 76.5                            | 16.0                             | 7.15                      | 30.1                         |
| 3202           | 169                     | 1.78                     | 3.53                           | 60.8                            | 19.8                             | 13.3                      | 46.6                         |
| 3203           | 159                     | 0                        | 1.39                           | 68.2                            | 16.9                             | 13.0                      | 63.5                         |
| 3204           | 164                     | 0                        | 0                              | 65.4                            | 25.6                             | 8.65                      | 47.4                         |
| 3205           | 146                     | 0                        | 0.58                           | 79.6                            | 15.8                             | 3.65                      | 44.1                         |
| 3301           | 144                     | 0                        | 4.06                           | 66.8                            | 25.6                             | 1.87                      | 28.5                         |
| 3302           | 133                     | 0                        | 2.25                           | 84.6                            | 11.9                             | 0.87                      | 37.9                         |
| 3303           | 143                     | 0                        | 0                              | 84.5                            | 15.4                             | 0                         | 24.3                         |
| 3304           | 139                     | 0                        | 0                              | 82.6                            | 13.1                             | 3.70                      | 28.3                         |
| 3306           | 130                     | 0                        | 0.12                           | 93.5                            | 5.73                             | 0                         | 25.5                         |
| Mean           | 152                     | 0.13                     | 1.3                            | 73.4                            | 18.6                             | 5.96                      | 50.5                         |

SUPPLEMENTARY TABLE S3. INPATIENT 34-H RESULTS AND HOTEL 51-H RESULTS

| <i>Subject</i> | <i>CGM&lt;50 (%)</i> | <i>50&lt;CGM&lt;70 (%)</i> | <i>180&lt;CGM&lt;250 (%)</i> | <i>250&lt;CGM (%)</i> | <i>Max (mg/dL)</i> | <i>Min (mg/dL)</i> |
|----------------|----------------------|----------------------------|------------------------------|-----------------------|--------------------|--------------------|
| 2101           | 0                    | 2.34                       | 22.6                         | 9.10                  | 319                | 62                 |
| 2102           | 0.26                 | 1.90                       | 10.5                         | 0                     | 226                | 49                 |
| 2103           | 0                    | 1.30                       | 8.61                         | 3.11                  | 319                | 60                 |
| 2104           | 0                    | 2.34                       | 5.99                         | 0                     | 202                | 58                 |
| 2105           | 0                    | 5.54                       | 8.69                         | 7.75                  | 311                | 54                 |
| 2201           | 0                    | 1.52                       | 17.6                         | 9.15                  | 356                | 57                 |
| 2202           | 0                    | 0.75                       | 14.8                         | 8.07                  | 338                | 68                 |
| 2203           | 0.25                 | 1.98                       | 20.0                         | 5.93                  | 285                | 48                 |
| 2204           | 0                    | 2.09                       | 22.0                         | 8.15                  | 312                | 61                 |
| 2205           | 0                    | 0                          | 40.1                         | 1.41                  | 257                | 104                |
| Mean           | 0.05                 | 1.98                       | 17.1                         | 5.27                  | 293                | 62                 |
| 3106           | 0                    | 0.32                       | 14.8                         | 3.10                  | 281                | 62                 |
| 3107           | 0                    | 0.82                       | 27.3                         | 9.57                  | 330                | 66                 |
| 3108           | 0                    | 4.45                       | 21.5                         | 4.62                  | 329                | 63                 |
| 3109           | 0.16                 | 2.13                       | 18.7                         | 9.46                  | 359                | 46                 |
| 3110           | 0                    | 0.33                       | 28.9                         | 17.0                  | 352                | 66                 |
| 3201           | 0                    | 0                          | 17.2                         | 5.91                  | 362                | 80                 |
| 3202           | 2.26                 | 3.29                       | 19.8                         | 13.9                  | 401                | 39                 |
| 3203           | 0                    | 1.54                       | 19.1                         | 13.9                  | 401                | 52                 |
| 3204           | 0                    | 0                          | 24.0                         | 9.15                  | 303                | 71                 |
| 3205           | 0                    | 1.33                       | 15.1                         | 3.17                  | 272                | 62                 |
| 3301           | 0                    | 3.77                       | 26.3                         | 2.45                  | 275                | 51                 |
| 3302           | 0                    | 2.14                       | 12.1                         | 0.82                  | 263                | 55                 |
| 3303           | 0                    | 0                          | 12.0                         | 0                     | 245                | 79                 |
| 3304           | 0                    | 0                          | 22.2                         | 8.28                  | 332                | 72                 |
| 3306           | 0                    | 0.17                       | 5.49                         | 0                     | 229                | 69                 |
| Mean           | 0.16                 | 1.35                       | 19.0                         | 6.75                  | 401                | 39                 |

SUPPLEMENTARY TABLE S4. PATIENT-LEVEL DAYTIME RESULTS (BEFORE 11 PM AND AFTER 7 AM)

| <i>Subject</i> | <i>Mean (mg/dL)</i> | <i>CGM&lt;50 (%)</i> | <i>50&lt;CGM&lt;70 (%)</i> | <i>70&lt;CGM&lt;180 (%)</i> | <i>180&lt;CGM&lt;250 (%)</i> | <i>250&lt;CGM (%)</i> |
|----------------|---------------------|----------------------|----------------------------|-----------------------------|------------------------------|-----------------------|
| 2101           | 167                 | 0                    | 3.61                       | 54.6                        | 30.8                         | 11                    |
| 2102           | 119                 | 0.26                 | 1.89                       | 89.1                        | 8.81                         | 0                     |
| 2103           | 138                 | 0                    | 0                          | 87.2                        | 9.09                         | 3.69                  |
| 2104           | 135                 | 0                    | 4.23                       | 86.5                        | 9.3                          | 0                     |
| 2105           | 146                 | 0                    | 5.32                       | 77.9                        | 8.9                          | 7.84                  |
| 2201           | 177                 | 0                    | 1.54                       | 56.1                        | 25.9                         | 16.5                  |
| 2202           | 145                 | 0                    | 1.56                       | 74.7                        | 15.4                         | 8.39                  |
| 2203           | 154                 | 0.26                 | 2.35                       | 67.4                        | 25.9                         | 4.08                  |
| 2204           | 156                 | 0                    | 4.31                       | 63.6                        | 20.1                         | 11.9                  |
| 2205           | 180                 | 0                    | 0                          | 47.7                        | 49.5                         | 2.79                  |
| Mean           | 152                 | 0.05                 | 2.48                       | 70.5                        | 20.4                         | 6.62                  |
| 3106           | 149                 | 0                    | 0.52                       | 81.5                        | 12.7                         | 5.1                   |
| 3107           | 159                 | 0                    | 1.31                       | 60.3                        | 36.8                         | 0                     |
| 3108           | 150                 | 0                    | 6.8                        | 59.1                        | 25.5                         | 7.28                  |
| 3109           | 166                 | 0.26                 | 2.17                       | 64.4                        | 18.2                         | 14.0                  |
| 3110           | 177                 | 0                    | 0.52                       | 54.8                        | 29.3                         | 14.7                  |
| 3201           | 170                 | 0                    | 0                          | 67.8                        | 21.2                         | 10.7                  |
| 3202           | 171                 | 2.67                 | 5.3                        | 53.8                        | 23.3                         | 14.0                  |
| 3203           | 177                 | 0                    | 2.08                       | 54.4                        | 23.8                         | 19.0                  |
| 3204           | 169                 | 0                    | 0                          | 62.3                        | 24.6                         | 13.0                  |
| 3205           | 152                 | 0                    | 0.87                       | 74.5                        | 18.6                         | 5.47                  |
| 3301           | 153                 | 0                    | 4.79                       | 56.5                        | 34.7                         | 2.81                  |
| 3302           | 142                 | 0                    | 3.37                       | 76.9                        | 17.9                         | 1.3                   |
| 3303           | 146                 | 0                    | 0                          | 83.5                        | 16.4                         | 0                     |
| 3304           | 151                 | 0                    | 0                          | 73.9                        | 19.7                         | 5.56                  |
| 3306           | 134                 | 0                    | 0.17                       | 90.2                        | 8.6                          | 0                     |
| Mean           | 158                 | 0.2                  | 1.86                       | 67.6                        | 22.1                         | 7.52                  |

SUPPLEMENTARY TABLE S5. PATIENT-LEVEL NIGHTTIME RESULTS (11 PM–7 AM)

| <i>Subject</i> | <i>Mean (mg/dL)</i> | <i>CGM&lt;50 (%)</i> | <i>50&lt;CGM&lt;70 (%)</i> | <i>70&lt;CGM&lt;180 (%)</i> | <i>180&lt;CGM&lt;250 (%)</i> | <i>250&lt;CGM (%)</i> |
|----------------|---------------------|----------------------|----------------------------|-----------------------------|------------------------------|-----------------------|
| 2101           | 107                 | 0                    | 2.29                       | 97.7                        | 0                            | 0                     |
| 2102           | 114                 | 0                    | 0                          | 100                         | 0                            | 0                     |
| 2103           | 117                 | 0                    | 5.21                       | 94.8                        | 0                            | 0                     |
| 2104           | 107                 | 0                    | 0                          | 100                         | 0                            | 0                     |
| 2105           | 97                  | 0                    | 9.38                       | 90.6                        | 0                            | 0                     |
| 2201           | 131                 | 0                    | 0                          | 99.0                        | 1.04                         | 0                     |
| 2202           | 110                 | 0                    | 0                          | 100                         | 0                            | 0                     |
| 2203           | 144                 | 0                    | 0                          | 75.8                        | 7.29                         | 16.9                  |
| 2204           | 172                 | 0                    | 0                          | 76.3                        | 15.6                         | 8.12                  |
| 2205           | 148                 | 0                    | 0                          | 80.8                        | 19.2                         | 0                     |
| Mean           | 125                 | 0                    | 1.69                       | 91.5                        | 4.31                         | 2.5                   |
| 3106           | 135                 | 0                    | 0                          | 83.2                        | 16.3                         | 0                     |
| 3107           | 135                 | 0                    | 0                          | 78.8                        | 20.7                         | 0                     |
| 3108           | 152                 | 0                    | 0                          | 85.4                        | 12.5                         | 2.08                  |
| 3109           | 146                 | 0                    | 0                          | 76.4                        | 17.4                         | 5.73                  |
| 3110           | 195                 | 0                    | 0                          | 49.6                        | 28.5                         | 21.9                  |
| 3201           | 135                 | 0                    | 0                          | 93.9                        | 5.62                         | 0                     |
| 3202           | 163                 | 0                    | 0                          | 74.9                        | 12.6                         | 12.0                  |
| 3203           | 124                 | 0                    | 0                          | 95.7                        | 3.12                         | 1.15                  |
| 3204           | 155                 | 0                    | 0                          | 71.8                        | 27.7                         | 0                     |
| 3205           | 135                 | 0                    | 0                          | 89.8                        | 10.2                         | 0                     |
| 3301           | 127                 | 0                    | 2.6                        | 87.5                        | 7.29                         | 0                     |
| 3302           | 114                 | 0                    | 0                          | 100                         | 0                            | 0                     |
| 3303           | 139                 | 0                    | 0                          | 86.5                        | 13.5                         | 0                     |
| 3304           | 113                 | 0                    | 0                          | 100                         | 0                            | 0                     |
| 3306           | 122                 | 0                    | 0                          | 100                         | 0                            | 0                     |
| Mean           | 139                 | 0                    | 0.17                       | 84.9                        | 11.7                         | 2.86                  |

SUPPLEMENTARY TABLE S6. PATIENT-LEVEL 24-H ADJUSTED BASELINE OPEN-LOOP RESULTS

| <i>Subject</i> | <i>Mean (mg/dL)</i> | <i>CGM&lt;50 (%)</i> | <i>50&lt;CGM&lt;70 (%)</i> | <i>70&lt;CGM&lt;180 (%)</i> | <i>180&lt;CGM&lt;250 (%)</i> | <i>250&lt;CGM (%)</i> |
|----------------|---------------------|----------------------|----------------------------|-----------------------------|------------------------------|-----------------------|
| 3106           | 139                 | 1.79                 | 7.87                       | 66.2                        | 19.9                         | 3.23                  |
| 3107           | 136                 | 0.86                 | 3.74                       | 76.6                        | 15.3                         | 3.01                  |
| 3108           | 165                 | 0                    | 1.93                       | 60.0                        | 25.2                         | 11.9                  |
| 3109           | 179                 | 0                    | 0.95                       | 52.2                        | 32.6                         | 13.6                  |
| 3110           | 176                 | 0.23                 | 0.77                       | 56.6                        | 22.9                         | 18.7                  |
| 3201           | 138                 | 0.45                 | 7.84                       | 64.2                        | 22.5                         | 3.81                  |
| 3202           | 137                 | 1.09                 | 4.98                       | 77.1                        | 13.2                         | 2.87                  |
| 3203           | 217                 | 1.53                 | 4.59                       | 29.8                        | 24.0                         | 38.8                  |
| 3204           | 155                 | 0.33                 | 3.2                        | 66.6                        | 18.2                         | 10.3                  |
| 3205           | 160                 | 0                    | 5.07                       | 59.2                        | 22.2                         | 12.9                  |
| 3301           | 157                 | 0.98                 | 2.37                       | 65.1                        | 21.9                         | 8.43                  |
| 3302           | 143                 | 0.31                 | 4.38                       | 72.8                        | 18.0                         | 3.75                  |
| 3303           | 163                 | 0                    | 1.3                        | 66.8                        | 19.2                         | 12.0                  |
| 3304           | 152                 | 0                    | 4.64                       | 64.9                        | 22.6                         | 7.08                  |
| 3306           | 190                 | 0                    | 0.75                       | 51.3                        | 29.2                         | 18.0                  |
| Mean           | 160                 | 0.5                  | 3.63                       | 62.0                        | 21.8                         | 11.2                  |
